# Supplementary material for: Designable NIR-II light triggered biocompatible Au NRs for highly efficient photothermal therapy of cervical cancer
Source: Royal Society of Chemistry journal article supplement (doi:10.1039/d5ra10095j), 2026-05-14
Supplement: d5ra10095j1.pdf [file d5ra10095j1.pdf]

## Supporting information

### Designable NIR-II Light Triggered Biocompatible Theranostic Au NRs for Highly Efficient Photothermal Therapy of Cervical Cancer

Jiabao Xiong,<sup>†a,b</sup> Hairegu Tuxun,<sup>†a,c</sup> Jiayi Ding,<sup>d</sup> Biao Dong,<sup>\*e</sup> Nuernisha Alifu<sup>\*a,b,c</sup>

a. State Key Laboratory of Pathogenesis, Prevention and Treatment of High Incidence Diseases in Central Asia/School of Medical Engineering and Technology, Xinjiang Medical University, Urumqi 830054, China

b. The Second Affiliated Hospital of Xinjiang Medical University, Xinjiang Medical University, Urumqi 830054, China.

c. Institute of Medical Engineering Interdisciplinary Research, Xinjiang Medical University, Urumqi, 830017, China.

d. School of public health, Xinjiang Medical University, Urumqi 830054, China.

e. College of Electronic Science and Engineering, Jilin University, Changchun 130012, China.

†Jiabao Xiong and Hairegu Tuxun contributed equally to this work.

Table S1 Gold nanorods for therapeutic use.

| NPs                                             | Ex                 | Power                           | PCE                | Irradiat      |                 | Application                                   | Reference       |
|-------------------------------------------------|--------------------|---------------------------------|--------------------|---------------|-----------------|-----------------------------------------------|-----------------|
|                                                 |                    |                                 |                    | ion           | Concentration   |                                               |                 |
|                                                 |                    |                                 |                    | time          |                 |                                               |                 |
| ACZ-P                                           | 1064<br>nm         | 1<br>W/cm <sup>2</sup>          | 27.54<br>%         | 5 min         | 100 µg/mL       | Osteosarcoma                                  | [1]             |
| Pt/Au NTs-<br>DTX/PCM                           | 808<br>nm          | 0.5<br>W/cm <sup>2</sup>        | 27.4<br>%          | 10 min        | 40 µg/mL        | Triple-<br>negative<br>breast cancer          | [2]             |
| VPNS/AuNR                                       | 808<br>nm          | 1<br>W/cm <sup>2</sup>          | 38%                | 10 min        | 100 µg/mL       | Skin wound<br>infection                       | [3]             |
| Au@MOF                                          | 808<br>nm          | 0.8<br>W/cm <sup>2</sup>        | 30.2<br>%          | 10 min        | 200 ppm         | Cervical<br>cancer                            | [4]             |
| AuNRs@SiO <sub>2</sub> -<br>RB@MnO <sub>2</sub> | 1064<br>nm         | 1<br>W/cm <sup>2</sup>          | 54%                | 10 min        | 100 µg/mL       | Breast Cancer                                 | [5]             |
| AuNRs@ZnO<br>@mPDA-TD                           | 808<br>nm          | 1.5<br>W/cm <sup>2</sup>        | 55.88<br>%         | 10 min        | 100 µg/mL       | Human<br>hepatocellular<br>carcinoma<br>cells | [6]             |
| AuNRs@TFF                                       | 1064<br>nm         | 1<br>W/cm <sup>2</sup>          | 38.86<br>%         | 10 min        | 50 µg/mL        | Breast Cancer                                 | [7]             |
| <b>Au NRs@PEG</b>                               | <b>1064<br/>nm</b> | <b>0.4<br/>W/cm<sup>2</sup></b> | <b>60.89<br/>%</b> | <b>10 min</b> | <b>25 µg/mL</b> | <b>Cervical<br/>cancer</b>                    | <b>our work</b> |

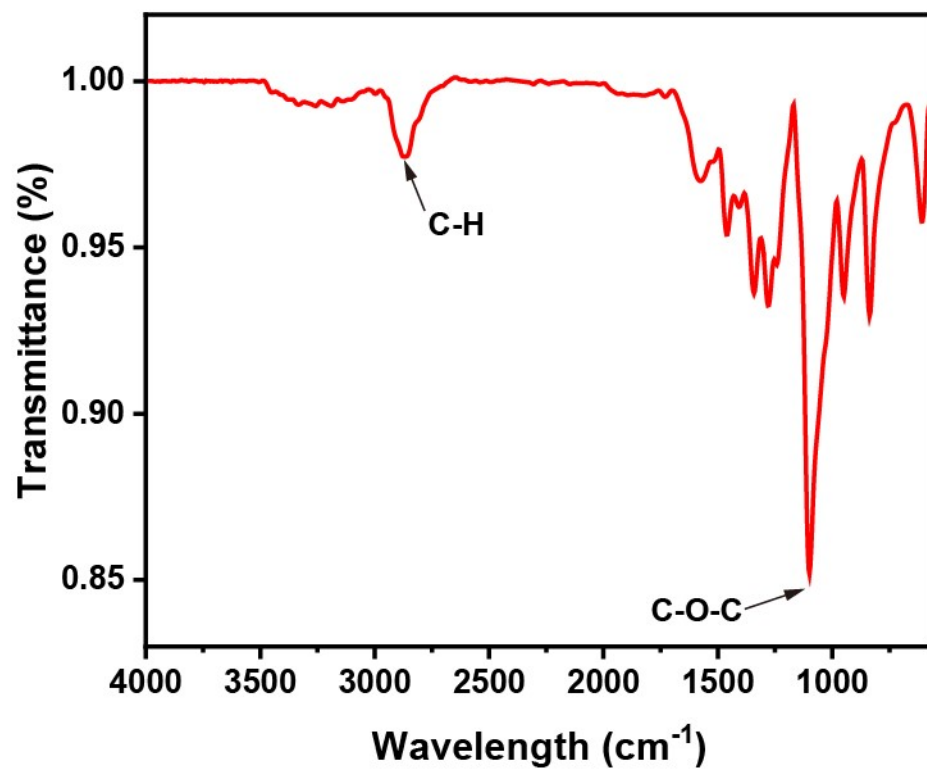

Fig. S1. FT-IR spectrum of Au NRs@PEG.

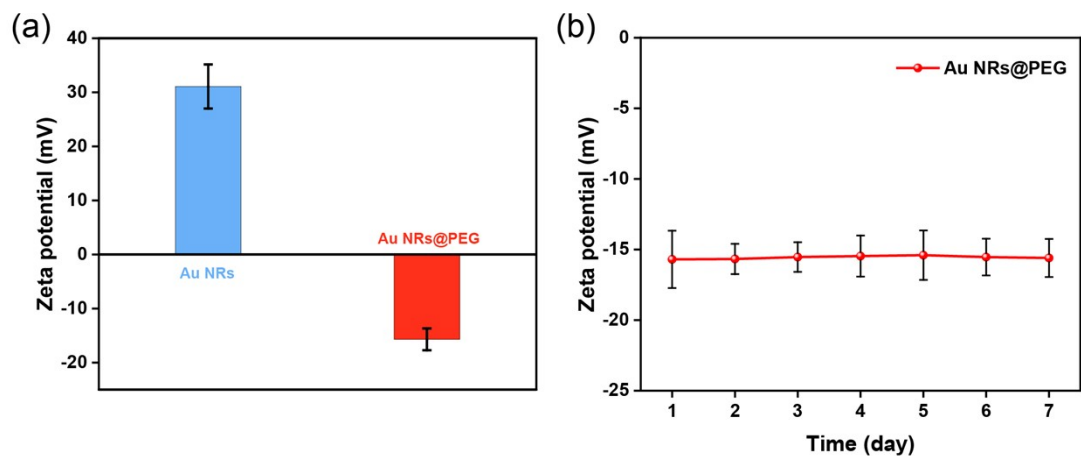

Fig. S2. (a) Zeta potential characterization of Au NRs and Au NRs@PEG. (b) Time-dependent variation in Zeta potential of Au NRs@PEG over a 7-day period.

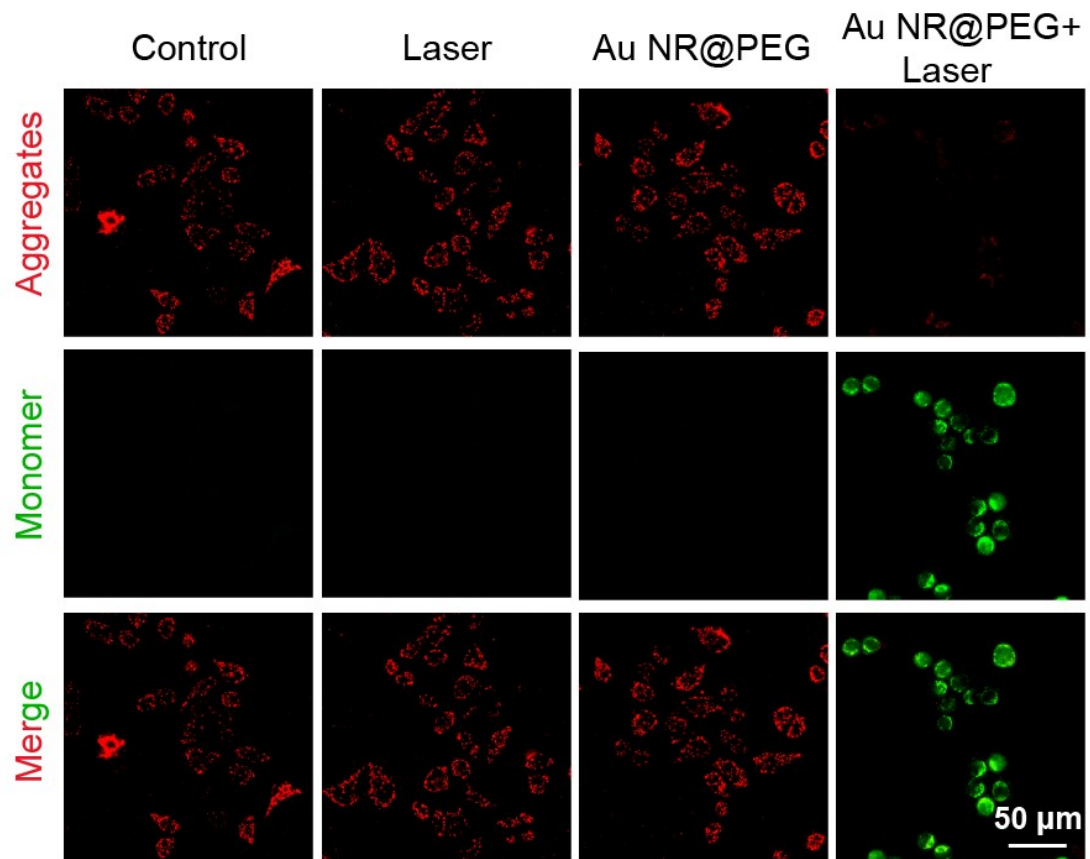

Fig. S3. Mitochondrial membrane potential detected by JC-1 fluorescent probe. (Scale bar = 50  $\mu$ m)

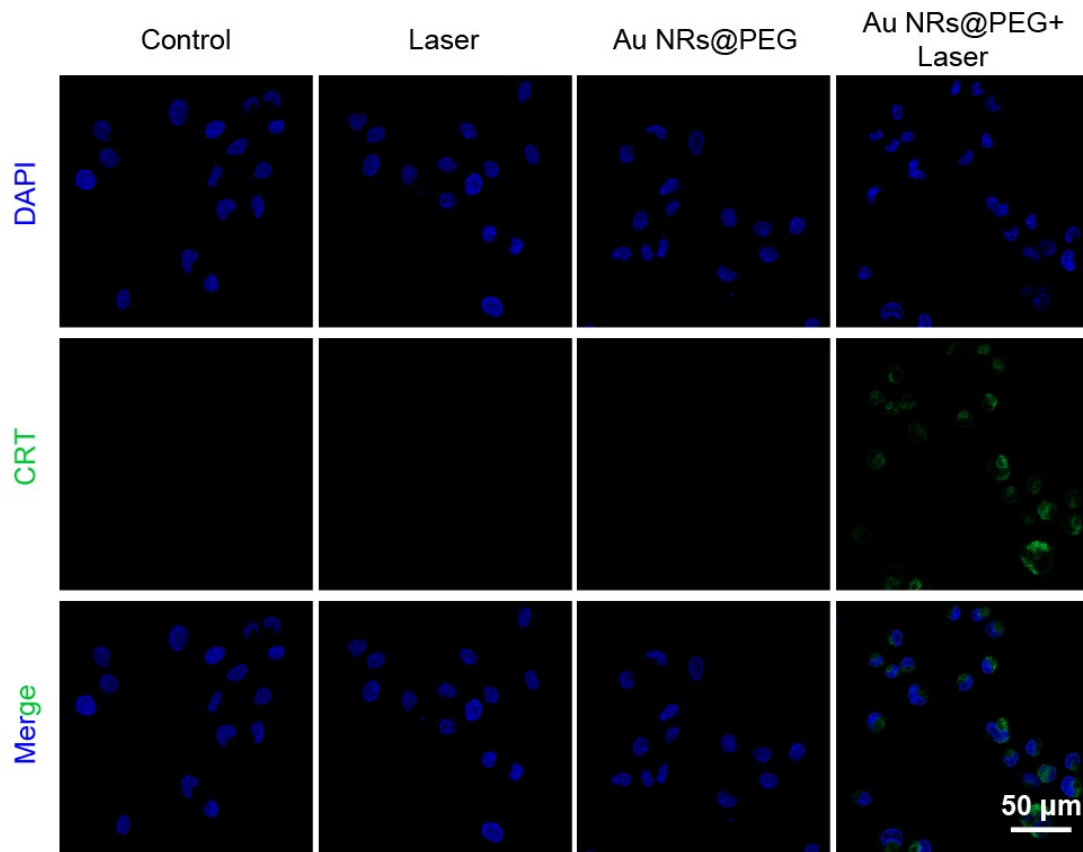

Fig. S4. Immunofluorescence staining of CRT in HeLa cells following various treatments. (Scale bar = 50 μm)

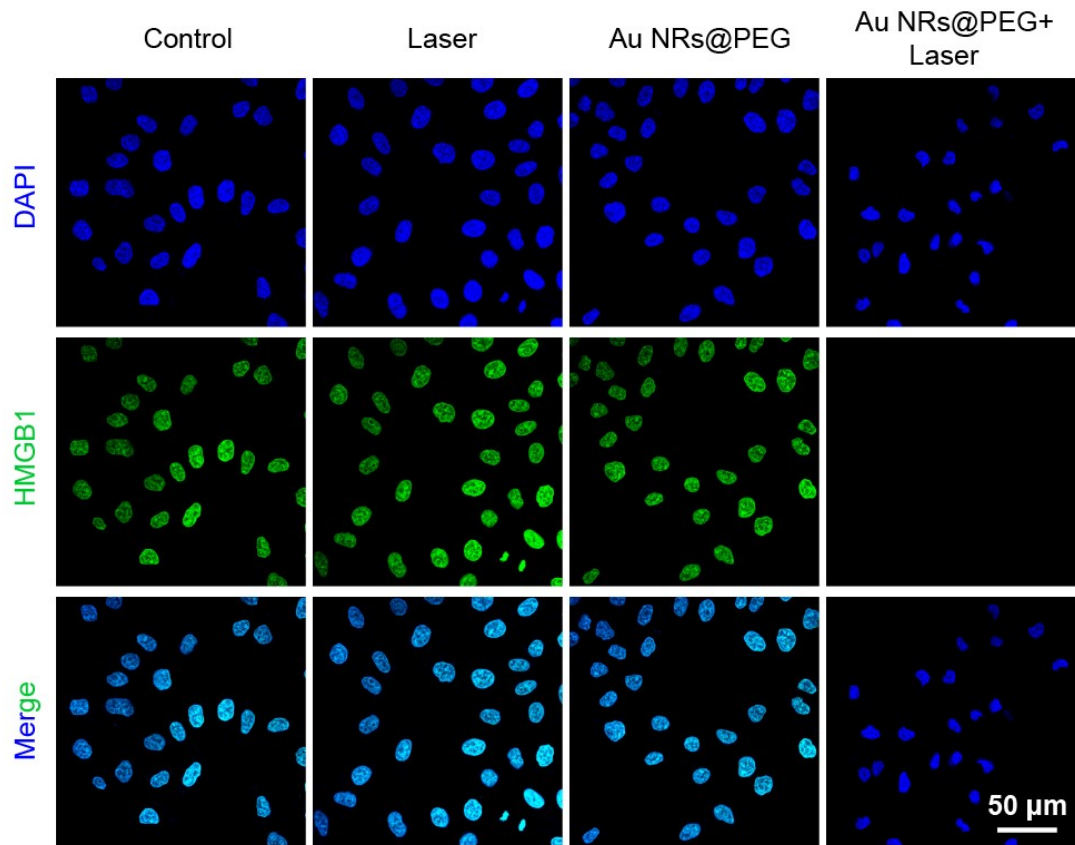

Fig. S5. Immunofluorescence staining of HMGB1 in HeLa cells following various treatments. (Scale bar = 50 μm)

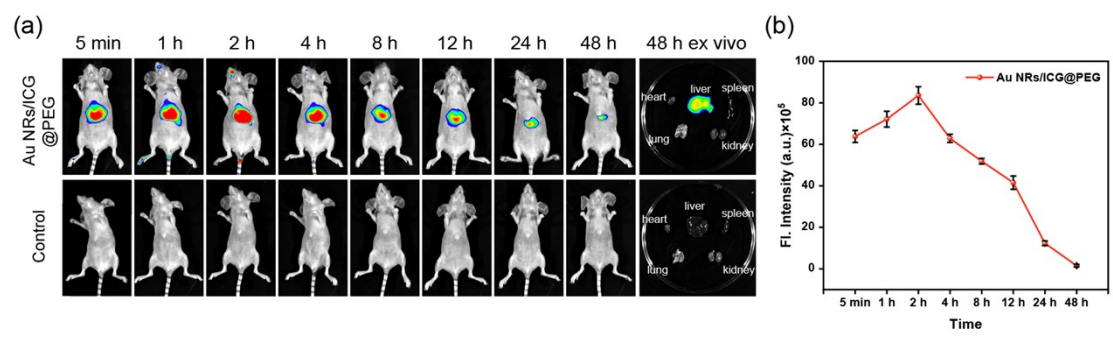

Fig. S6. (a) NIR-I fluorescence imaging of ICG-loaded Au NRs@PEG in nude mice at different time points. (b) Quantitative analysis of fluorescence intensity at the corresponding time points.

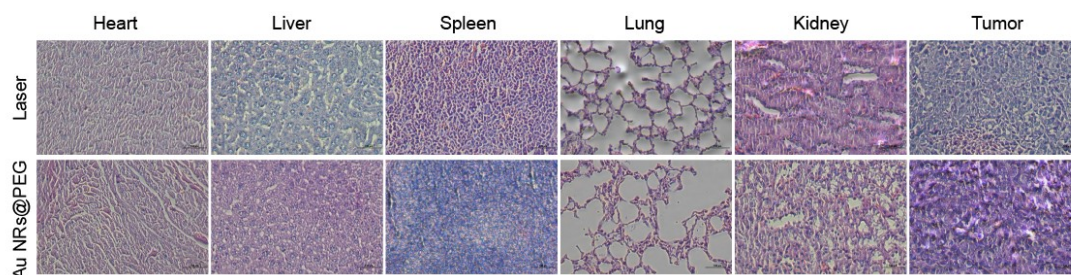

Fig. S7. H&E staining of tumors and organs isolated from mice in the laser group and Au NRs@PEG group. Scale bar = 50  $\mu\text{m}$  for all images

#### Reference

- [1] C. Feng, W. Zheng, Y. Jiang, W. Fu, W. Huang, C. Shen, Y. Wang and H. Qian, *Nano Lett.*, 2024, **24**, 295–304.
- [2] H. Yang, Q. Zhang, L. Dai, Y. Wang, G. Zheng, X. Zhang, D. Zheng, X. Ji, Y. Sang and Z. Nie, *Adv Healthcare Materials*, 2024, **13**, 2400662.
- [3] Q. Shen, Z. Li, H. Bai, M. Gu, J. Kang, R. Jia, J. Zhang and A. Dong, *Journal of materials chemistry. B*, 2024, **12**, 3392–3403.
- [4] X. Deng, S. Liang, X. Cai, S. Huang, Z. Cheng, Y. Shi, M. Pang, P. Ma and J. Lin, *Nano Lett.*, 2019, **19**, 6772–6780.
- [5] C. Wen, X. Guo, C. Gao, Z. Zhu, N. Meng, X. Shen and H. Liang, *Journal of materials chemistry. B*, 2022, **10**, 4274-4284.
- [6] Z. Ma, Z. Han, M. Wan, Z. Wang, M. Gao, Y. Zhao and L. Sun, *Surfaces and Interfaces*, 2025, **61**, 106153.
- [7] N. Leng, Y. Zhou, C. Wen, Q. Fang, X. Guo, B. Cai, K. Huang and H. Liang, *Biomaterials Advances*, 2025, **166**, 214056.
